# Supplementary material for: Metabolic Modulators in Cardiovascular Complications of Systemic Lupus Erythematosus
Source: MDPI journal article supplement (doi:10.3390/biomedicines11123142), 2023-11-25
Supplement: s1 [file s1]

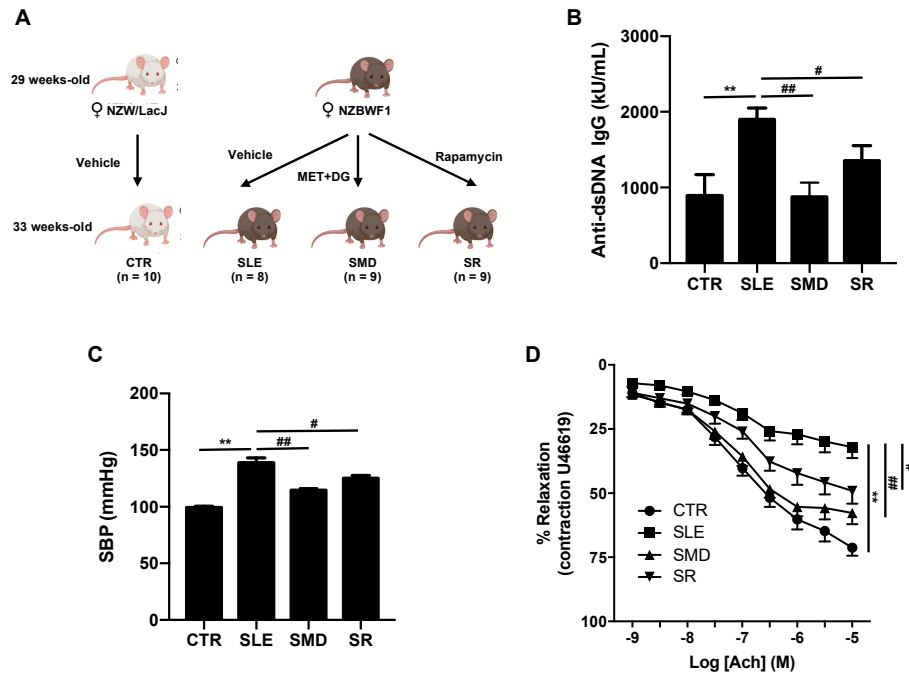

**Figure S1.** Protective effects of metabolic modulators on autoimmunity, hypertension, and endothelial dysfunction in female NZBWF1 mice. (A) Experimental design: 29 weeks old female NZW/LacJ mice and NZBWF1 were used in this experiment. NZW/LacJ mice were used as control (CTR group). NZBWF1 lupus mice were randomly assigned to three groups: SLE (no treatment group), SMD (SLE mice treated with metformin (MET) + 2-deoxyglucose (DG), and SR (Lupus-treated with rapamycin) for 4 weeks. (B) Plasma anti-ds-DNA levels, (C) final systolic blood pressure (SBP) measured by tail plethysmography, and (D) endothelium-dependent relaxation induced by acetylcholine (Ach) in aorta from all experimental groups. Values are expressed as means  $\pm$  SEM,  $n = 8-10$ ,  $**P < 0.01$  compared to the CTR group,  $\#P < 0.05$  and  $##P < 0.01$  compared to the untreated SLE group, one-way ANOVA.
